# Supplementary material for: Crystalline iceplant-like nano-NaVPO4F@graphene as an intercalation-type anode material for sodium-ion batteries
Source: Royal Society of Chemistry journal article supplement (doi:10.1039/c9cc08225e), 2020-01-01
Supplement: c9cc08225e1.pdf [file c9cc08225e1.pdf]

## Electronic Supplementary Information

Crystalline-iceplant-like nano-NaVPO<sub>4</sub>F@graphene as an intercalation-type anode  
material for sodium-ion batteries

Bin Cheng,<sup>abc</sup> Shengjie Zhang,<sup>a</sup> Haitao Zhuo<sup>a\*</sup> and Shaojun Chen,<sup>c\*</sup>

<sup>a</sup> Shenzhen Key Laboratory of Functional Polymer, College of Chemistry and Environmental Engineering, Shenzhen University, Shenzhen, 518060, China.

<sup>b</sup> Key Laboratory of Optoelectronic Devices and Systems of Ministry of Education and Guangdong Province, College of Optoelectronic Engineering, Shenzhen University, Shenzhen 518060, China.

<sup>c</sup> Shenzhen Key Laboratory of Polymer Science and Technology, College of Materials Science and Engineering, Shenzhen University, Shenzhen 518060, China.

## Experimental

### 1.1 Synthesis of NVPFG

NVPFG was synthesized using a freeze-drying process as shown in Fig. 1. In brief, graphite oxide was obtained with the Hummers method.<sup>1</sup> Graphite oxide is exfoliated in water using ultrasonic waves to obtain graphene oxide (GO) solution. Stoichiometric amounts of  $\text{NH}_4\text{VO}_3$ , oxalic acid,  $\text{NH}_4\text{H}_2\text{PO}_4$  and NaF were sequentially dissolved in water and kept at 50 °C to promote dissolution. After complete dissolution, the solution was added dropwise into the GO solution and persistently stirred. The mixture was then rapidly frozen in liquid  $\text{N}_2$  and dried in a freeze dryer. The dry precursor was pre-sintered at 350 °C in an Argon atmosphere for 5 hours. After cooling to room temperature, the precursor was ground and sintered at 750 °C for 8 hours in Argon atmosphere to yield the NVPFG composite.

### 1.2 Materials characterizations

The crystalline structures of the composite and the electrodes after discharging and charging were characterized by X-ray diffraction (XRD) using an X-ray diffractometer (Bruker D8 Advance, Cu  $K_\alpha$  radiation). Thermogravimetric analysis (TGA) was conducted in the air from room temperature to 800 °C under a heating rate of 10 °C  $\text{min}^{-1}$  using a thermal analyzer (TGA Q50). The Raman spectrum was taken by a Raman spectrometer (Renishaw-inVia, UK). The morphology of NVPFG was observed with a scanning electron microscope (SEM, Hitachi Su-70) and a transmission electron microscope (TEM, JEM-2100&X-Max80). X-ray photoelectron spectroscopy (XPS) were recorded by a Microlab 350 spectrometer employing a monochromatic Mg- $K_\alpha$  X-ray source.

### 1.3 Electrochemical measurements

The electrochemical characterization of NVPFG was evaluated using CR2032 coin-cells. A homogeneous slurry was obtained by mixing NVPFG, acetylene black (AB) and poly(vinylidene difluoride) (PVDF) in a weight ratio of 8:1:1 in N-methyl-2-pyrrolidone (NMP). This slurry was then coated on a copper foil and dried in an electric oven to obtain an electrode laminate. Afterwards, CR2032 half-cells were assembled in an argon-filled glove box (MBRAUN MB-Labstar 1500/780). The electrolyte was 1 M  $\text{NaClO}_4$  in propylene carbonate (PC), while glass fiber (Whatman GF/D) was used as the separator. The coin-cells were evaluated on a Neware BTS-4008 multichannel battery test system within the voltage range of 0.01-2.70 V at different C rates (1 C= 143  $\text{mAh g}^{-1}$ ).

1 W.S. Hummers and R.E. Offeman Hummers, *J. Am. Chem. Soc.*, 1958, **80**, 1339.

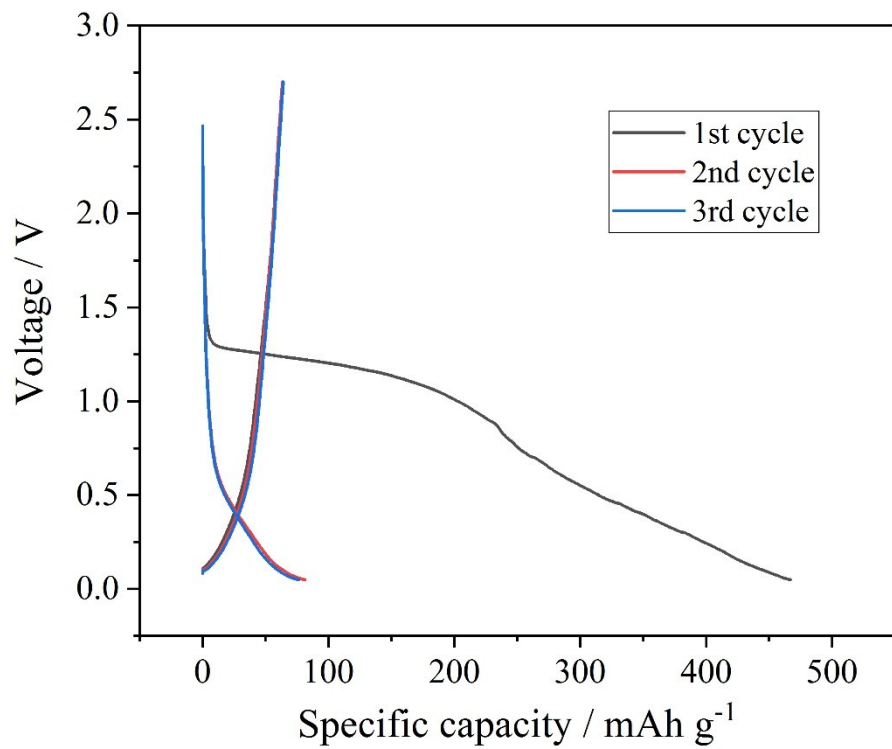

Fig. S1. Voltage profiles of acetylene black at 0.1 C.

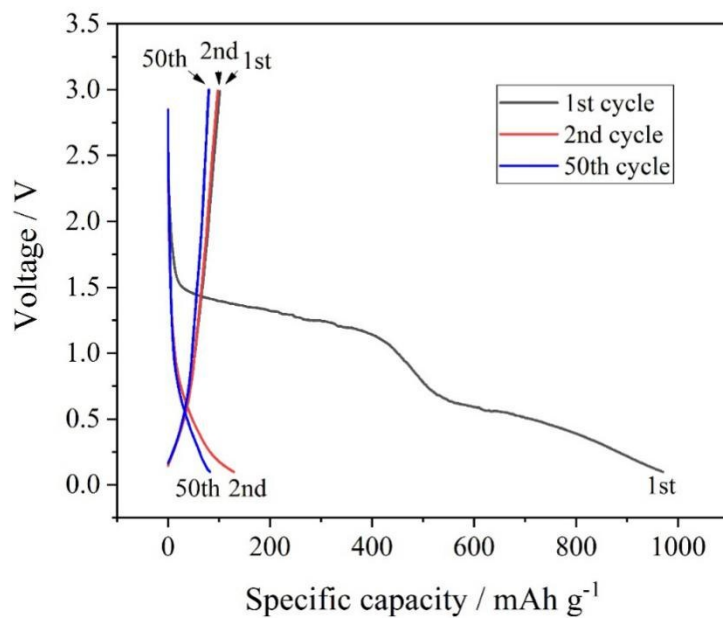

Fig. S2. Voltage profiles of graphene at 0.1 C.

Tab. S1. The specific capacity of the initial cycle.

|                                                    | NVPF  | graphene | Acetylene<br>black | total |
|----------------------------------------------------|-------|----------|--------------------|-------|
| Mass ratio <sup>a</sup>                            | 0.92  | 0.08     | 0.125              |       |
| Initial specific capacity<br>/ mAh g <sup>-1</sup> | X     | 100      | 64                 |       |
| Initial capacity / mAh g <sup>-1</sup>             | 0.92X | 8        | 8                  | 148   |

a. the mass ratios are based on the mass of NVPPG.

So, the specific capacity (X) of NVPF in the initial cycle is calculated to be 143 mAh g<sup>-1</sup>.
